# Supplementary material for: CHCHD10 mutations promote loss of mitochondrial cristae junctions with impaired mitochondrial genome maintenance and inhibition of apoptosis
Source: PubMed Central journal article supplement (PMC4718158; doi:10.15252/emmm.201505496), 2015-12-14
Supplement: EMMM-8-58-s004.pdf [file EMMM-8-58-s004.pdf]

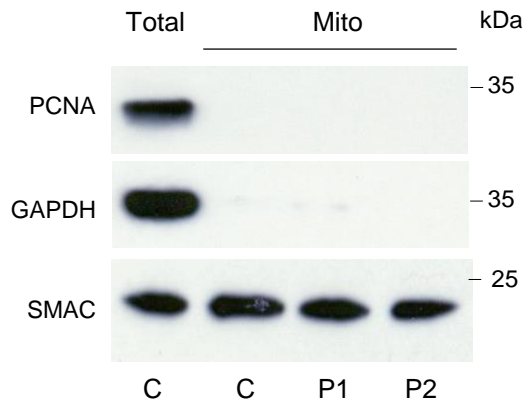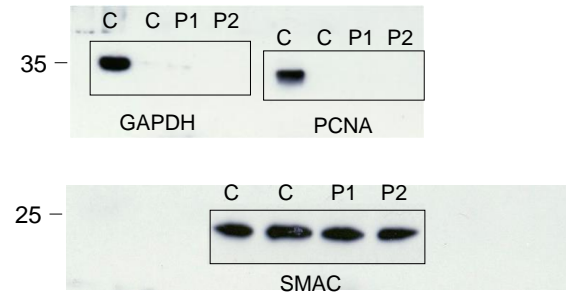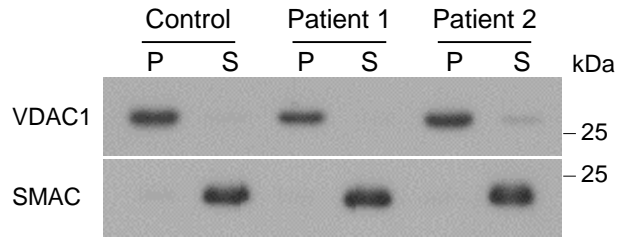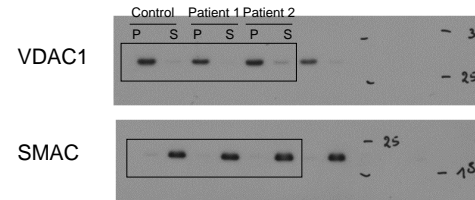

**Figure 5**

**Uncropped scans  
Figure 5**
