# Supplementary material for: CHCHD10 mutations promote loss of mitochondrial cristae junctions with impaired mitochondrial genome maintenance and inhibition of apoptosis
Source: PubMed Central journal article supplement (PMC4718158; doi:10.15252/emmm.201505496), 2015-12-14

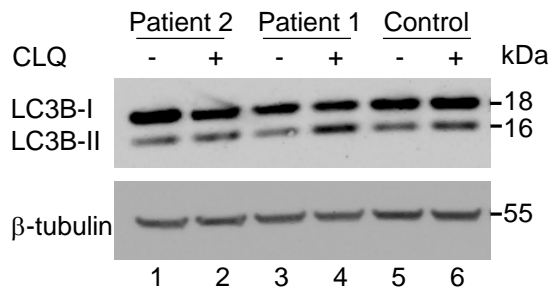

**Figure 6**

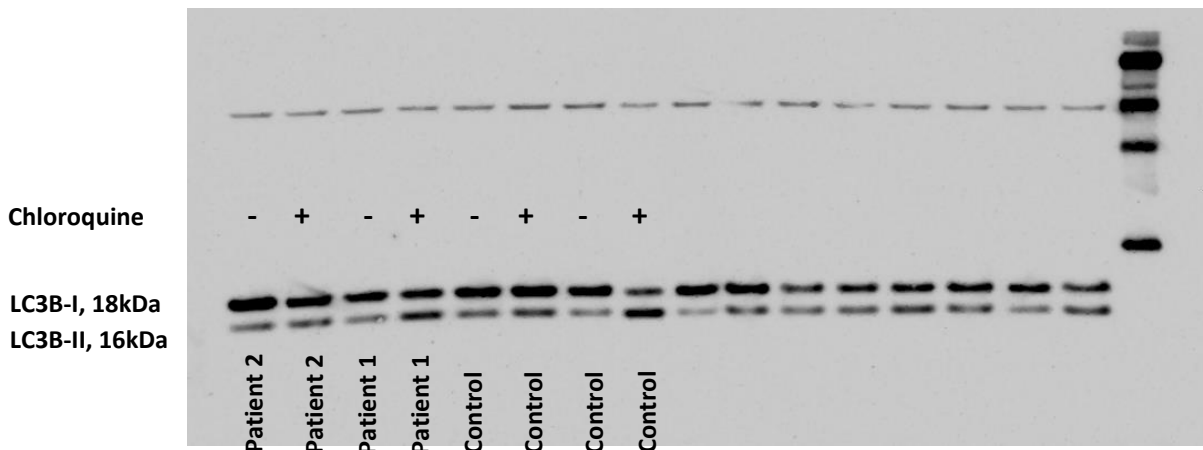

**Uncropped scans  
Figure 6**

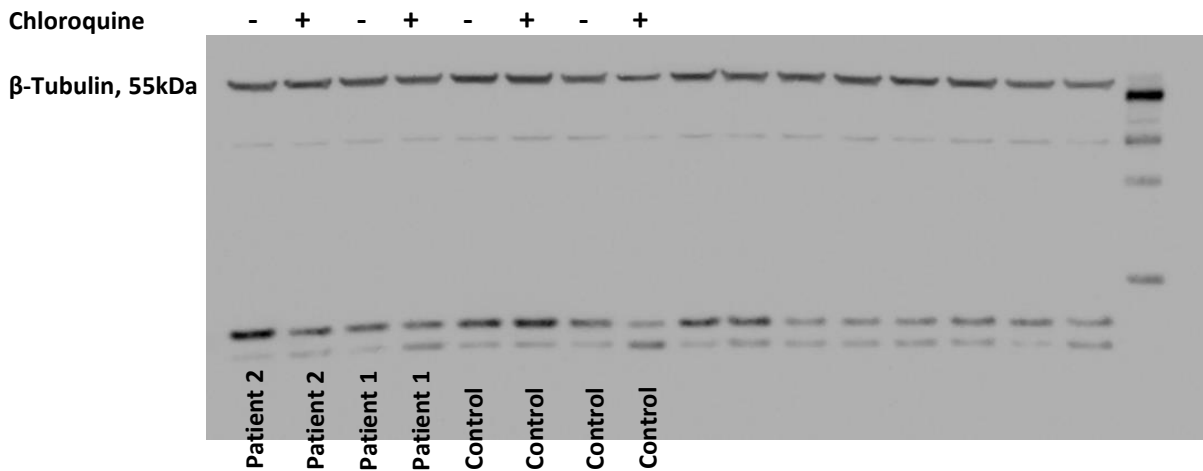

Supplement: EMMM-8-58-s005.pdf [file EMMM-8-58-s005.pdf]
